# Supplementary material for: MFF Regulation of Mitochondrial Cell Death Is a Therapeutic Target in Cancer
Source: Oxford University Press journal article supplement (doi:10.1158/0008-5472.can-19-1982), 2019-10-03
Supplement: 00085472can191982-sup-224683_2_supp_5790797_py5ccn.docx [file 00085472can191982-sup-224683_2_supp_5790797_py5ccn.docx]

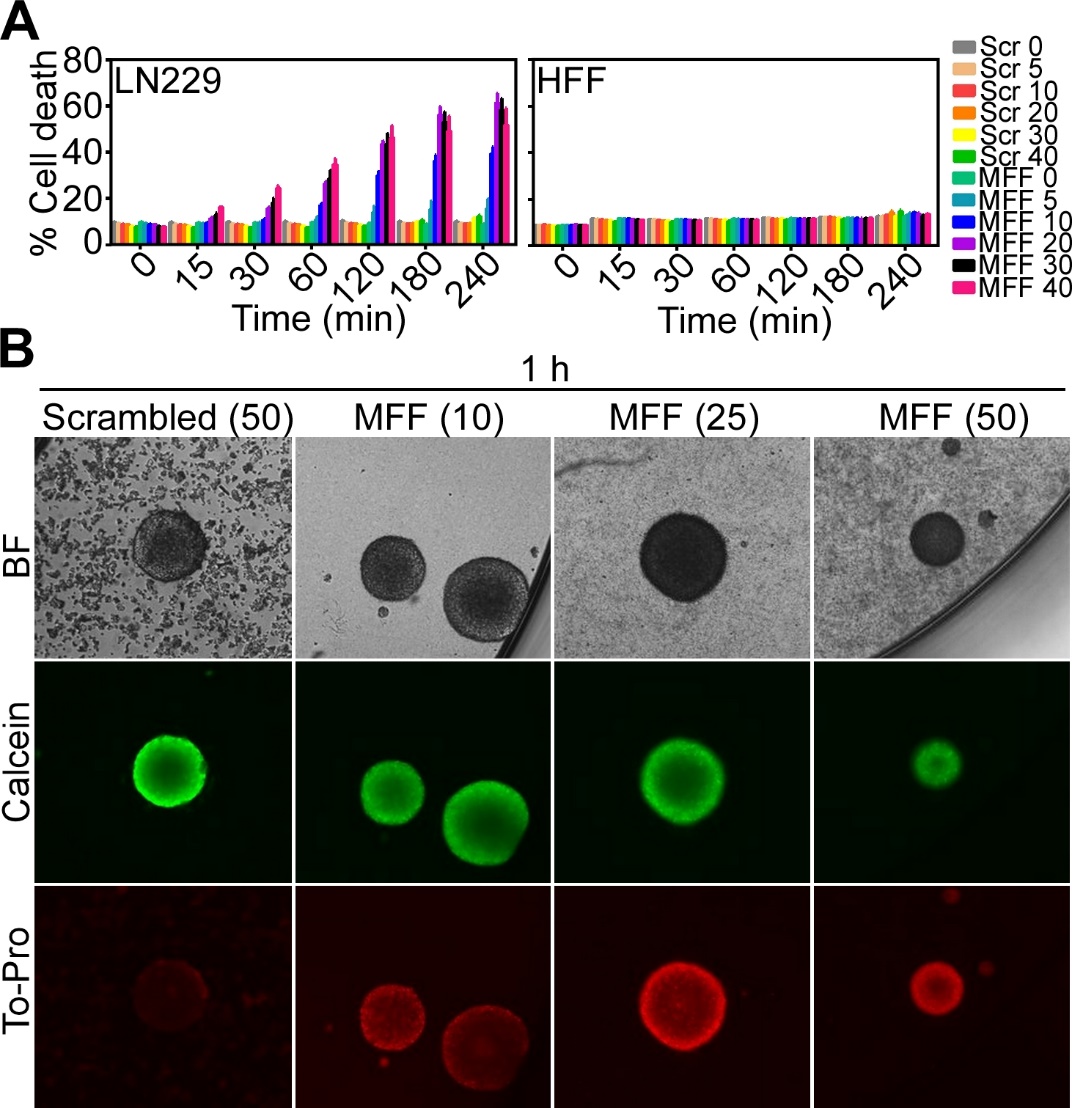


**Supplementary Fig. S6**. Anti-glioma activity of MFF peptidomimetic. **A**, Glioblastoma (GBM) LN229 cells or normal HFF were treated with increasing concentrations of cell-permeable scrambled peptide or cell-permeable MFF peptide #8-11 (0-40 M) and analyzed for cell death at the indicated time intervals. Mean±SD (n=3). **B**,Primary, patient-derived human GBM neurospheres were treated with cell-permeable scrambled peptide (50 M) or the indicated increasing concentrations of MFF (D) 8-11 peptidomimetic (10-50 M) for 1 h, stained with calcein (live cells) or To-Pro (dead cells) and analyzed for fluorescence expression. FU, fluorescence units; BF, bright field.
