# Supplementary material for: MFF Regulation of Mitochondrial Cell Death Is a Therapeutic Target in Cancer
Source: Oxford University Press journal article supplement (doi:10.1158/0008-5472.can-19-1982), 2019-10-03
Supplement: 00085472can191982-sup-224683_2_supp_5790806_py5qqn.docx [file 00085472can191982-sup-224683_2_supp_5790806_py5qqn.docx]

**Supplementary Table S2**. Mutant peptides derived from MFF1 peptide #8 used in this study.

| **Peptide #** | **Sequence** |
| --- | --- |
| **8-1** | NLSSARGILSLIQSSTRRAYQQILDVL |
| **8-2** | SARGILSLIQSSTRRAYQQILDVL |
| **8-3** | GILSLIQSSTRRAYQQILDVL |
| **8-4** | SLIQSSTRRAYQQILDVL |
| **8-5** | QSSTRRAYQQILDVL |
| **8-6** | DGANLSSARGILSLIQSSTRRAYQQIL |
| **8-7** | DGANLSSARGILSLIQSSTRRAYQ |
| **8-8** | DGANLSSARGILSLIQSSTRR |
| **8-9** | DGANLSSARGILSLIQSS |
| **8-10** | DGANLSSARGILSLI |
