# Supplementary material for: MFF Regulation of Mitochondrial Cell Death Is a Therapeutic Target in Cancer
Source: Oxford University Press journal article supplement (doi:10.1158/0008-5472.can-19-1982), 2019-10-03
Supplement: 00085472can191982-sup-224683_2_supp_5790808_py5yyy.docx [file 00085472can191982-sup-224683_2_supp_5790808_py5yyy.docx]

**Supplementary Table S1**. MFF1 synthetic peptides used in this study.

| **Peptide #** | **Sequence** | **Amino acid range** |
| --- | --- | --- |
| **1** | AEMAEISRIQYEMEYTEGISQRMRVP | 25-50 |
| **2** | VPEKLKVAPPNADLEQGFQEGVPNASVIMQ | 49-78 |
| **3** | MQVPERIVVAGNNEDVSFSRPADLDLIQST | 77-106 |
| **4** | STPFKPLALKTPPRVLTLSERPLDFLDLER | 105-134 |
| **5** | ERPPTTPQNEEIRAVGRLKRERSMSENAVR | 133-162 |
| **6** | VRQNGQLVRNDSLWHRSDSAPRNKISRFQA | 161-190 |
| **7** | QAPISAPEYTVTPSPQQARVCPPHMLPEDG | 189-218 |
| **8** | DGANLSSARGILSLIQSSTRRAYQQILDVL | 217-246 |
| **9** | VLDENRRPVLRGGSAAATSNPHHDNVRYGI | 245-274 |
| **10** | GISNIDTTIEGTSDDLTV | 273-290 |
| **11** | VVDAASLRRQIIKLNRRLQLLEEENKERAKREM | 290-322 |
