# Supplementary material for: MFF Regulation of Mitochondrial Cell Death Is a Therapeutic Target in Cancer
Source: Oxford University Press journal article supplement (doi:10.1158/0008-5472.can-19-1982), 2019-10-03
Supplement: 00085472can191982-sup-224683_2_supp_5795762_pycb86.docx [file 00085472can191982-sup-224683_2_supp_5795762_pycb86.docx]

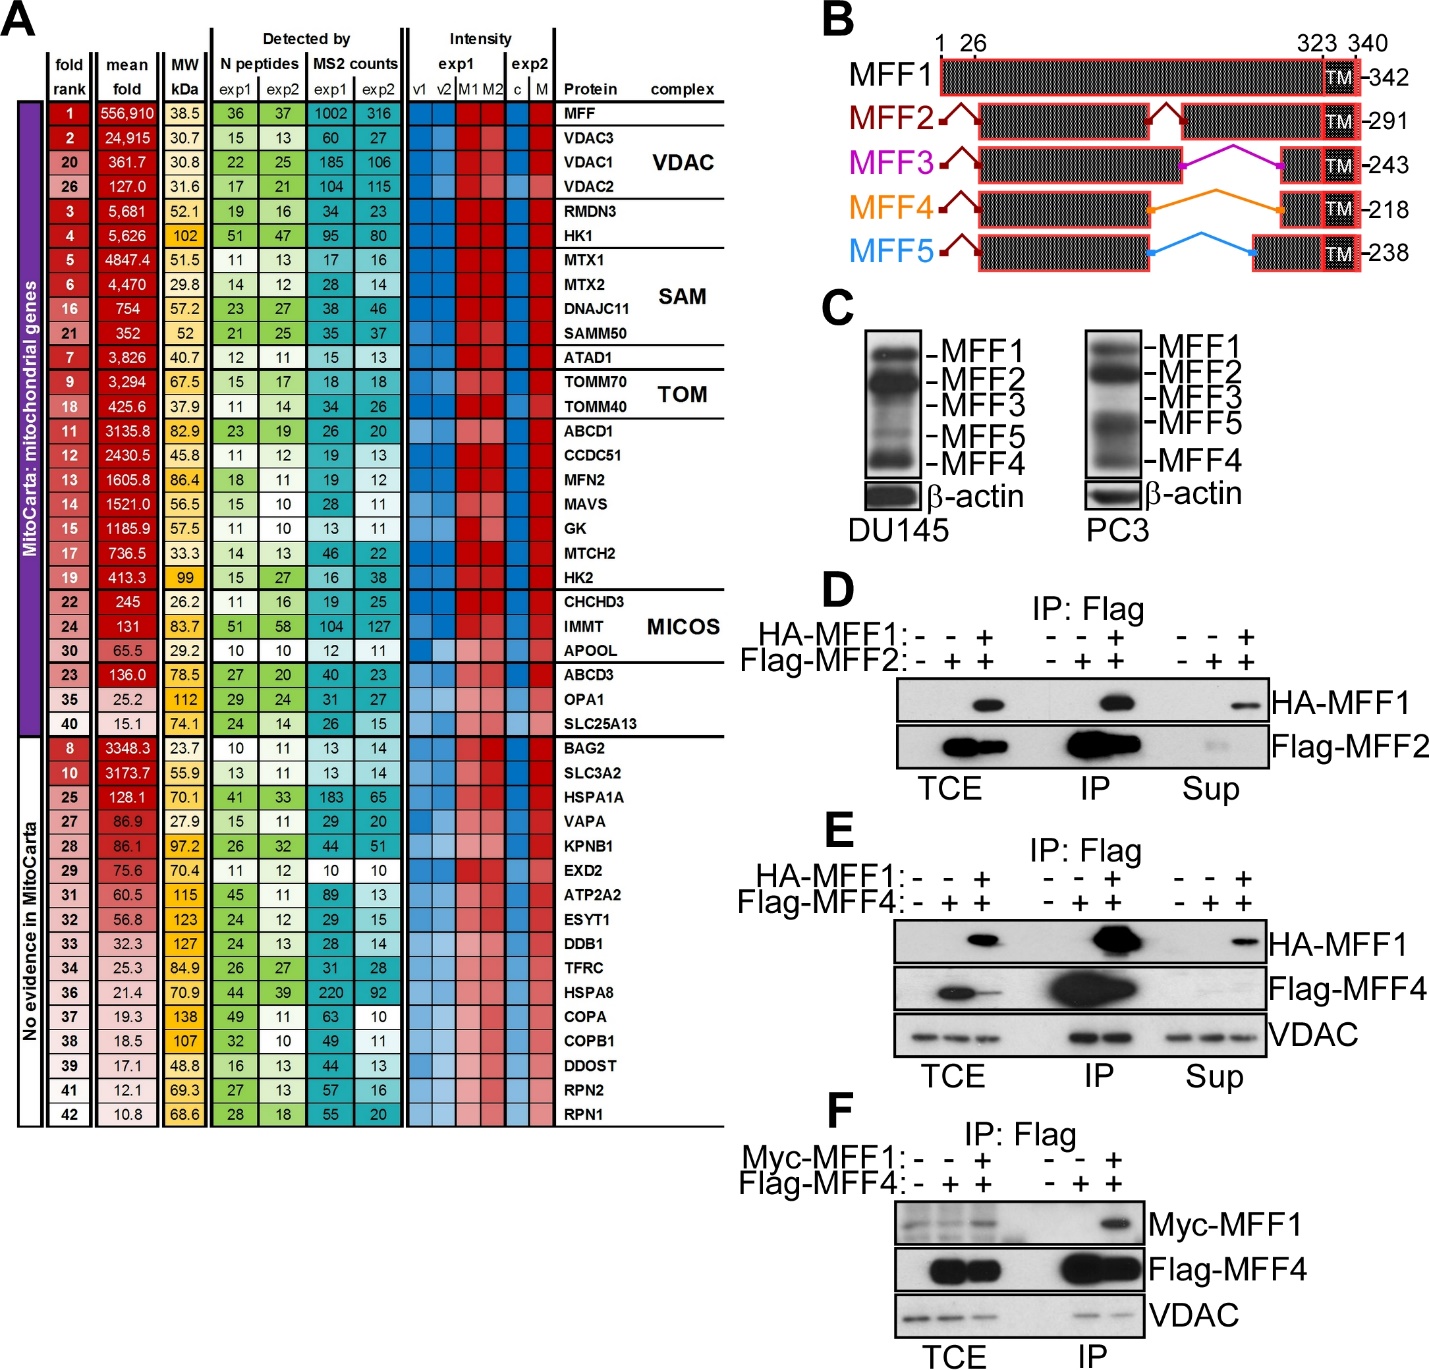


**Supplementary Fig. S2**.MFF-VDAC1 complex in cancer. **A**, Heat map of MFF-associated proteins identified by a 1D proteomics screening in PC3 cells. The mean fold, number of peptides and MS counts in two independent experiments are shown. The four main categories of MFF-associated proteins by pathway analysis (VDAC, SAM, TOM, MICOS) are shown on the right. **B**, Schematic diagram of predicted human MFF isoforms generated by alternative splicing of a single *MFF* locus. TM, transmembrane domain. The nomenclature of MFF isoforms by numbers is indicated. **C**, Total extracts from DU145 (left) or PC3 (right) cells were analyzed by Western blotting. The position of individual MFF isoforms is indicated. **D-F**, PC3 cells transfected with vector or the indicated HA- or Flag-tagged MFF cDNAs were immunoprecipitated (IP) with an antibody to Flag and analyzed by Western blotting. TCE, total cell extracts; Sup, supernatant.
